# Supplementary material for: Structure of 3-mercaptopropionic acid dioxygenase with a substrate analog reveals bidentate substrate binding at the iron center
Source: PubMed Central journal article supplement (PMC8050391; doi:10.1016/j.jbc.2021.100492), 2021-03-01
Supplement: mmc1.pdf [file mmc1.pdf]

## Structure of 3-mercaptopropionic acid dioxygenase with a substrate analog reveals bidentate substrate binding at the iron center

Nicholas J. York<sup>1</sup>, Molly M. Lockart<sup>1</sup>, Sinjinee Sardar<sup>2</sup>, Nimesh Khadka<sup>3</sup>, Wuxian Shi<sup>4</sup>, Ronald E. Stenkamp<sup>5</sup>, Jianye Zhang<sup>6</sup>, Philip D. Kiser<sup>\*.6,7,8</sup>, and Brad S. Pierce<sup>\*1</sup>

<sup>1</sup> Department of Chemistry & Biochemistry, University of Alabama, 250 Hackberry Lane, Tuscaloosa, Alabama 35487, United States

<sup>2</sup> Department of Chemistry & Biochemistry, The University of Texas at Arlington, 700 Planetarium Place, Arlington, Texas 76019, United States

<sup>3</sup> Department of Pharmacology, Case Western Reserve University, 10900 Euclid Avenue, Cleveland, OH 44106, United States

<sup>4</sup> National Synchrotron Light Source-II, Brookhaven National Laboratory, Upton, NY, United States

<sup>5</sup> Departments of Biological Structure and Biochemistry, University of Washington, 1705 NE Pacific Street, Seattle, WA 98195, United States

<sup>6</sup> Department of Ophthalmology, School of Medicine, University of California, Irvine, 837 Health Sciences Road, Irvine, CA 92697, United States

<sup>7</sup> Department of Physiology & Biophysics, School of Medicine, University of California, Irvine, 837 Health Sciences Road, Irvine, CA 92697, United States

<sup>8</sup> Research Service, VA Long Beach Healthcare System, 5901 E 7th St, Long Beach, CA 90822, United States

**Running title:** *Mode of substrate binding in a thiol dioxygenase*

\* To whom correspondence should be addressed: Department of Chemistry and Biochemistry, University of Alabama Tuscaloosa, Alabama 35487, USA, Telephone: (205)348-8445. E-mail: [bspierce1@ua.edu](mailto:bspierce1@ua.edu)  
Department of Physiology & Biophysics, University of California Irvine, California 92617, USA, Telephone: (949)824-6954. Email: [pkiser@uci.edu](mailto:pkiser@uci.edu)

**Keywords:** Thiol dioxygenase, non-heme iron, oxygenase, competitive inhibition, structure, DFT, computational modeling, iron-nitrosyl, FT-EPR, HYSORE

**SUPPLEMENTAL TABLES**

**Table S1.** X-ray diffraction data collection and structure refinement statistics

| <i>Data collection and processing<sup>1</sup></i>  |                                |                                      |
|----------------------------------------------------|--------------------------------|--------------------------------------|
| Crystal                                            | 3-HPA complex (crystal form A) | Thiocyanate complex (crystal form B) |
| X-ray source                                       | NSLS-II (FMX 17-ID-2)          | APS (NE-CAT 24-ID-E)                 |
| Wavelength (Å)                                     | 0.979339                       | 0.979180                             |
| Space group                                        | <i>P</i> 3 <sub>1</sub>        | <i>P</i> 6 <sub>1</sub> 22           |
| Unit cell lengths (Å)                              | a = 178.22, c = 75.92          | a = 102.18, c = 301.93               |
| Resolution (Å) <sup>†</sup>                        | 50 – 2.25 (2.39 – 2.25)        | 50 – 2.95 (3.13 – 2.95)              |
| Unique reflections                                 | 127,973 (20,673)               | 20,505 (3,185)                       |
| Multiplicity                                       | 4.4 (4.4)                      | 12.9 (13.4)                          |
| Completeness (%)                                   | 99.9 (99.8)                    | 99.8 (99.2)                          |
| $\langle I/\sigma I \rangle$                       | 6.35 (0.78)                    | 12.9 (0.98)                          |
| $R_{\text{merge}}I$ (%)                            | 15.0 (164.2)                   | 18.5 (288.3)                         |
| CC <sub>1/2</sub> (%)                              | 99.3 (48.4)                    | 99.9 (46.8)                          |
| Wilson <i>B</i> factor (Å <sup>2</sup> )           | 55                             | 86                                   |
| <i>Refinement</i>                                  |                                |                                      |
| Resolution (Å)                                     | 46.26 – 2.25                   | 49.88 – 2.95                         |
| No reflections <sup>‡</sup>                        | 121,709 (6,243)                | 19,476 (1,026)                       |
| $R_{\text{work}}/R_{\text{free}}$ (%) <sup>†</sup> | 19.6 (22.6)                    | 21.4 (24.1)                          |
| Twin law ( $\alpha$ ) <sup>∇</sup>                 | k, h, -l (0.34)                | N/A                                  |
| No. atoms                                          | 18,870                         | 6,166                                |
| Protein                                            | 18,374                         | 6,124                                |
| Iron                                               | 12                             | 4                                    |

|                                         |                       |                        |
|-----------------------------------------|-----------------------|------------------------|
| 3-Hydropropionic acid                   | 72                    | ---                    |
| Chloride/thiocyanate                    | 13 (Cl <sup>-</sup> ) | 12 (SCN <sup>-</sup> ) |
| Water                                   | 395                   | 24                     |
| <B-factor> (Å <sup>2</sup> )            | 57                    | 105                    |
| Protein                                 | 57                    | 105                    |
| Iron                                    | 52                    | 86                     |
| 3-Hydroxypropionic acid                 | 53                    | ---                    |
| Chloride/thiocyanate                    | 63                    | 122                    |
| Water                                   | 50                    | 81                     |
| RMS deviations                          |                       |                        |
| Bond lengths (Å)                        | 0.006                 | 0.003                  |
| Bond angles (°)                         | 1.27                  | 1.22                   |
| Ramachandran plot (% favored/outliers)* | 96.4/0                | 94.0/0                 |
| Molprobit score (%)                     | 100                   | 100                    |
| PDB accession code                      | 6XB9                  | 7KOV                   |

<sup>1</sup>Each data set was collected from a single crystal

<sup>†</sup>Values in parentheses are for the highest resolution shell of data

<sup>‡</sup>Values in parentheses are the number of reflections used for cross-validation

<sup>∇</sup>Twin fraction was refined in REFMAC based on the observed and calculated amplitudes

<sup>\*</sup>Evaluated using Molprobit

**Table S2.** Comparison of Av3MDO bond distances with other thiolate-bound non-heme iron complexes. Distances are shown for the iron to bound thiolate (Fe-S), either bidentate bound substrate carboxylate, amine, or equivalent (Fe-O or Fe-N<sub>amine</sub>), and average iron to histidine or equivalent nitrogen. All units are in Ångströms.

|                                                                                   | Fe-S              | Fe-O              | Fe-N <sub>amine</sub> | Fe-N <sub>his ave</sub> | ref       |
|-----------------------------------------------------------------------------------|-------------------|-------------------|-----------------------|-------------------------|-----------|
| AvMDO- <b>3HPA</b> complex <sup>a</sup>                                           | 2.16 <sup>b</sup> | 2.17              | -                     | 2.16                    | This work |
| <b>Fe<sup>II</sup> structures</b>                                                 |                   |                   |                       |                         |           |
| AvMDO <b>3HPA</b> <sup>1-</sup> -bound <sup>c</sup>                               | 2.26 <sup>b</sup> | 2.25              | -                     | 2.15                    | This work |
| AvMDO <b>3HPA</b> <sup>2-</sup> -bound <sup>c</sup>                               | 1.91 <sup>b</sup> | 2.55 <sup>d</sup> | -                     | 2.17                    | This work |
| AvMDO <b>3MPA</b> -bound <sup>c</sup>                                             | 2.33              | 2.51 <sup>d</sup> | -                     | 2.19                    | This work |
| RnCDO cysteine-bound <sup>a</sup>                                                 | 2.35              | -                 | 2.35                  | 2.17                    | (1)       |
| [Fe <sup>II</sup> (2-MTS)( <sup>Ph2</sup> TIP)]BPh <sub>4</sub> <sup>a</sup>      | 2.32              | 2.12              | -                     | 2.16                    | (2)       |
| [Fe <sup>II</sup> (CysOEt)( <sup>Ph2</sup> TIP)]BPh <sub>4</sub> <sup>a</sup>     | 2.31              | -                 | 2.26                  | 2.17                    | (3)       |
| [Fe <sup>II</sup> (Me <sub>3</sub> TACN)(abt)(OTf)] <sup>a</sup>                  | 2.44              | -                 | 2.23                  | 2.25                    | (4)       |
| [Fe <sup>II</sup> (Me <sub>3</sub> TACN)(abt <sup>CF3</sup> )(OTf)] <sup>a</sup>  | 2.43              | -                 | 2.24                  | 2.24                    | (4)       |
| [Fe <sup>II</sup> (iPr <sub>3</sub> TACN)(abt)(OTf)] <sup>a</sup>                 | 2.36              | -                 | 2.26                  | 2.20                    | (4)       |
| [Fe <sup>II</sup> (iPr <sub>3</sub> TACN)(abt <sup>CF3</sup> )(OTf)] <sup>a</sup> | 2.38              | -                 | 2.27                  | 2.20                    | (4)       |
| <b>Fe<sup>III</sup> structures</b>                                                |                   |                   |                       |                         |           |
| Av3MDO <b>3HPA</b> <sup>1-</sup> -bound <sup>c</sup>                              | 2.23 <sup>b</sup> | 1.97              | -                     | 2.13                    | This work |
| Av3MDO <b>3HPA</b> <sup>2-</sup> -bound <sup>c</sup>                              | 1.87 <sup>b</sup> | 2.14              | -                     | 2.18                    | This work |
| Av3MDO <b>3MPA</b> -bound <sup>c</sup>                                            | 2.32              | 2.08              | -                     | 2.20                    | This work |
| [Fe <sup>III</sup> (2-MTS)( <sup>Ph2</sup> TIP)]-CN <sup>c</sup>                  | 2.20              | 1.96              | -                     | 2.17                    | (2)       |
| [Fe <sup>II</sup> (CysOEt)( <sup>Ph2</sup> TIP)]-CN <sup>c</sup>                  | 2.18              | -                 | 2.05                  | 2.17                    | (2)       |
| (L-Cys/CN)-CDO cross-linked <sup>c</sup>                                          | 2.28              | -                 | 2.09                  | 2.07                    | (5)       |
| (L-Cys/CN)-CDO non-cross-linked <sup>c</sup>                                      | 2.26              | -                 | 2.11                  | 2.05                    | (5)       |

<sup>a</sup> Distances obtained from crystal structure. <sup>b</sup> 3-oxide of **3HPA** instead of sulfur. <sup>c</sup> Distances obtained from computational methods. <sup>d</sup> To some extent, the longer Fe-O<sub>(carboxylate)</sub> distance of 2.51 - 2.55 Å can be attributed to the is likely attributed to electrostatic interaction of the anionic carboxylate group with adjacent Arg168. However, a larger issue is the simultaneously accommodation of three negative charges [Cl<sup>-</sup> and **3HPA**<sup>2-</sup> (or **3MPA**<sup>2-</sup>)] directly coordinated to the Fe-site resulting in a monoanionic active site complex, ([Fe<sup>II</sup>(His)<sub>3</sub>Cl(X<sup>2-</sup>)]<sup>-</sup>, X = **3HPA**<sup>2-</sup> or **3MPA**<sup>2-</sup>). This suggests that chloride is an unfavorable ligand for the catalytically relevant **3MPA**-bound Av3MDO Fe(II)-site.

**Table S3.** Geometric properties of the DFT optimized (**3MPA/NO**)-Fe(II) *A*v3MDO models. Three structures were optimized differing in the hydrogen bond donation of the Tyr159 hydroxyl group.

|                                                            | Tyr-OH $\rightarrow$ N <sub>(NO)</sub> | Tyr-OH $\rightarrow$ O <sub>(NO)</sub> | Tyr-OH $\rightarrow$ N $\delta$ -His157 |
|------------------------------------------------------------|----------------------------------------|----------------------------------------|-----------------------------------------|
| <i>Distance (Å)</i>                                        |                                        |                                        |                                         |
| Fe-S                                                       | 2.38                                   | 2.40                                   | 2.41                                    |
| Fe-O <sub>(carb)</sub>                                     | 2.08                                   | 2.08                                   | 2.11                                    |
| Fe-N <sub>(NO)</sub>                                       | 1.89                                   | 1.84                                   | 1.82                                    |
| N-O                                                        | 1.18                                   | 1.18                                   | 1.17                                    |
| Fe-His <sub>(Ave)</sub>                                    | 2.21                                   | 2.23                                   | 2.24                                    |
| Fe-H90                                                     | 2.19                                   | 2.23                                   | 2.19                                    |
| Fe-H92                                                     | 2.24                                   | 2.26                                   | 2.29                                    |
| Fe-H142                                                    | 2.21                                   | 2.20                                   | 2.23                                    |
| Tyr-OH-X <sup>a</sup>                                      | 2.11                                   | 1.98                                   | 1.78                                    |
| <i>Angles <math>\angle</math> (°)</i>                      |                                        |                                        |                                         |
| Fe-S-C $\alpha$                                            | 95.7                                   | 97.8                                   | 94.0                                    |
| Fe-N-O                                                     | 138.7                                  | 145.7                                  | 151.0                                   |
| H90-Fe-N <sub>(NO)</sub>                                   | 170.0                                  | 176.8                                  | 168.9                                   |
| H92-Fe-S                                                   | 174.8                                  | 175.2                                  | 173.9                                   |
| O <sub>(carb)</sub> -Fe-S                                  | 95.0                                   | 93.8                                   | 95.3                                    |
| <b>3MPA</b> C <sub>1</sub> -C <sub>2</sub> -C <sub>3</sub> | 120.4                                  | 120.1                                  | 118.8                                   |

<sup>a</sup> X refers to the hydrogen binding partner of the Tyr157 hydroxyl group, being either the nitrogen or oxygen of nitric oxide or the  $\delta$ -nitrogen of His157.

**Table S4.** Calculated vs experimental Mössbauer parameters for wild-type **3MPA**-bound MDO with added nitric oxide (percent error shown in parentheses). Calculations are based on bidentate bound **3MPA** with nitrosyl group in the axial position *trans* to His90.

|                                  | Isomer shift<br>$\delta$ (mm/s) | Quadrupole splitting,<br>$ \Delta E_Q $ (mm/s) | asymmetry<br>( $\eta$ ) | Ref       |
|----------------------------------|---------------------------------|------------------------------------------------|-------------------------|-----------|
| Experimental                     | 0.60                            | 1.52                                           | 0.4                     | (6)       |
| Tyr-OH---N <sub>(nitrosyl)</sub> | 0.550 (8.4%)                    | 1.474 (3.0%)                                   | 0.546                   | This work |
| Tyr-OH---O <sub>(nitrosyl)</sub> | 0.554 (7.7%)                    | 1.325 (12%)                                    | 0.686                   | This work |
| Tyr-OH---His157                  | 0.585 (2.5%)                    | 1.611 (6.0%)                                   | 0.593                   | This work |

**Table S5.** The dipolar coupling in MHz and polar angles in degrees for each  $^1\text{H}$  included in HYSCORE simulations. Shown below are the polar angles that relate a  $^1\text{H}$  on **3MPA** to magnetic axis system. The angle  $\varphi$  represents rotation in x-y plane, whereas  $\theta$  is the deviation from the z-axis defined by the Fe-NO bond.

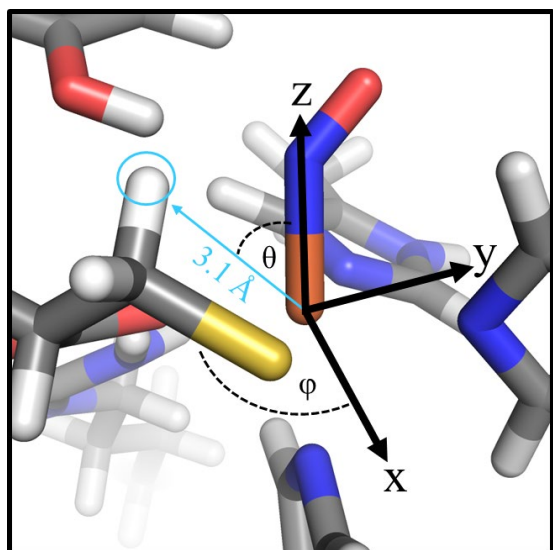

| $^1\text{H}$      | $T(\text{MHz})$ | $\varphi$ ( $^\circ$ ) | $\theta$ ( $^\circ$ ) | Distance from Fe ( $\text{Å}$ ) |
|-------------------|-----------------|------------------------|-----------------------|---------------------------------|
| His90             | 2.37            | 35                     | 110                   | 3.4                             |
| His90             | 2.40            | 160                    | 140                   | 3.4                             |
| His92             | 2.36            | 110                    | 63                    | 3.3                             |
| His92             | 2.30            | 80                     | 92                    | 3.5                             |
| His142            | 2.34            | 40                     | 128                   | 3.5                             |
| His142            | 1.36            | 165                    | 58                    | 3.3                             |
| C3 of <b>3MPA</b> | 1.16            | 115                    | 79                    | 4.2                             |
| C3 of <b>3MPA</b> | 2.54            | 120                    | 59                    | 3.1                             |

## SUPPLEMENTAL FIGURES

Figure S1

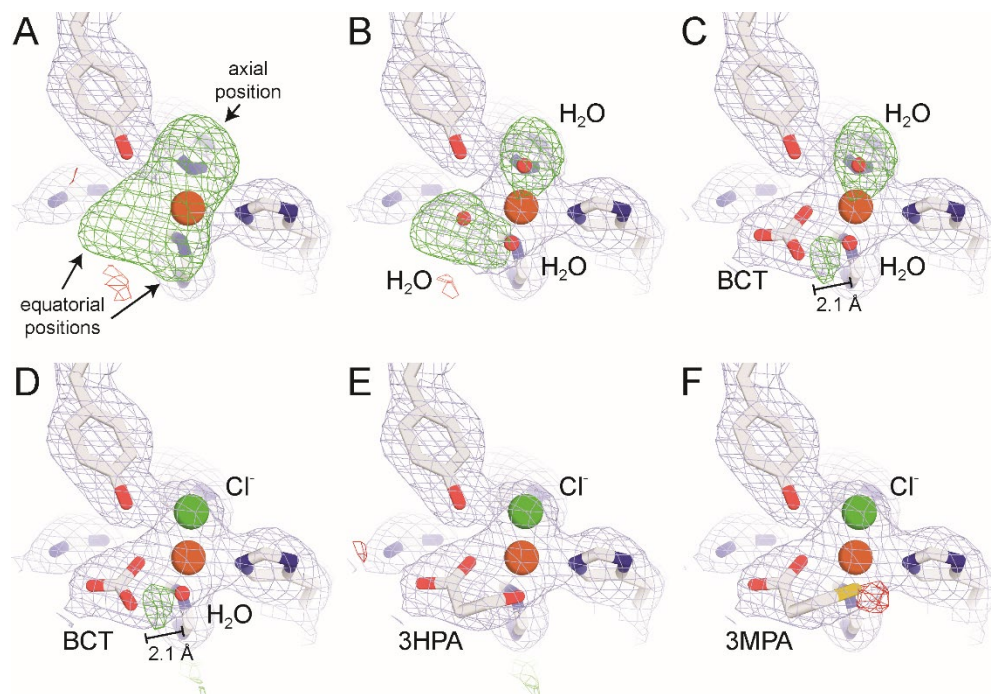

**Figure S1.** *Av3MDO* active site difference density modeling. In all panels the blue mesh represents sigma A-weighted  $2F_o-F_c$  density for chain B of the structure contoured at 1 RMSD and the green and red mesh represent NCS-averaged, sigma A-weighted  $F_o-F_c$  density contoured at +8 and -8 RMSD respectively. **A.** Map before modeling the open coordination sites. **B.** Updated maps following refinement with three aquo ligands modeled. The three aquo model poorly accounts for the difference map feature. **C.** Updated maps following refinement with two aquo ligands and one bicarbonate (**BCT**) modeled. **D.** Updated maps following refinement with one aquo ligand, one chloride (**Cl<sup>-</sup>**) and bicarbonate modeled. Chloride fully accounts for the difference density at the axial coordination site. Note the unacceptably close contact between bicarbonate and the modeled solvent and the residual strong positive density between these two moieties. **E.** Updated maps following refinement with one chloride (**Cl<sup>-</sup>**) and 3-hydroxypropionic acid (**3HPA**) modeled. This model fully accounts for the active site density. **F.** Updated maps following refinement with one chloride (**Cl<sup>-</sup>**) and 3-mercaptpropionic acid (**3MPA**) modeled. Note the difference map hole at the S atom confirming the presence of a lower Z atom (e.g. oxygen) at that site.

Figure S2

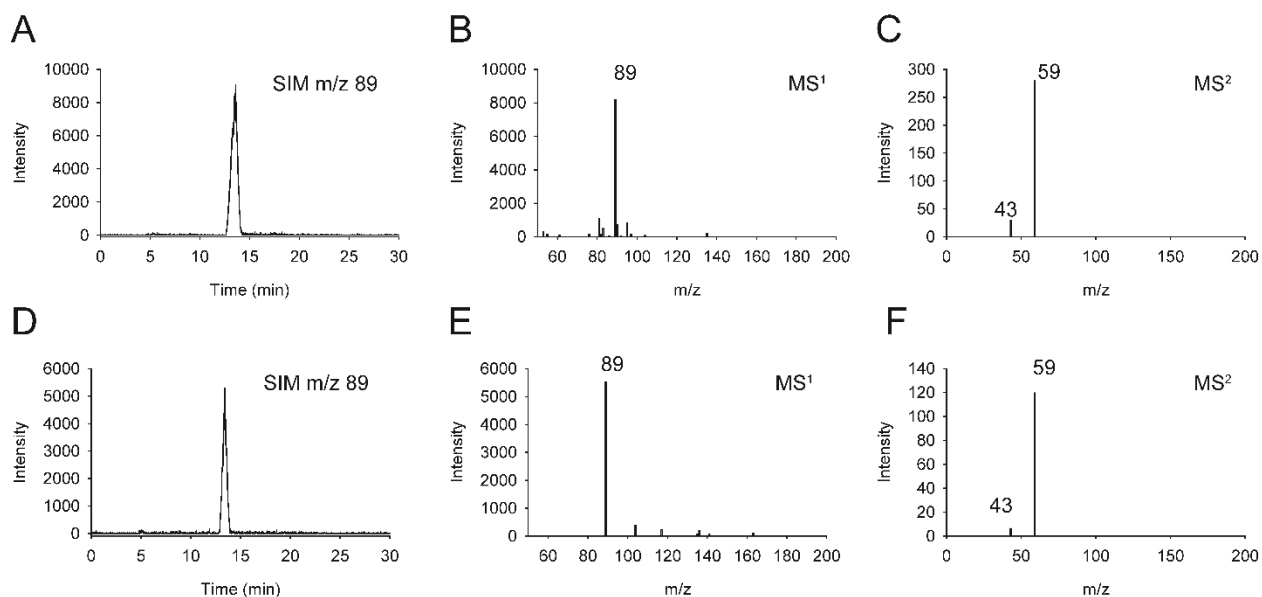

**Figure S2.** Mass spectrometry detection of **3HPA** in sodium polyacrylate 5100 solution used for *Av3MDO* crystallization. **A.** Negative ion-mode LC-MS of 3HPA standard with selective ion monitoring (SIM) of  $m/z = 89$  species corresponding to deprotonated 3HPA. **B.** MS<sup>1</sup> spectrum of the SIM  $m/z 89$  peak. **C.** MS<sup>2</sup> spectrum showing fragmentation of the  $m/z 89$  precursor ion to form  $m/z = 59$  ( $-H_2CO$ ) and 43 ( $-HCOOH$ ) species. **D.** LC-MS of the polyacrylate solution extract carried out in this same manner as (**A**) showing a single SIM  $m/z 89$  peak with a retention time and fragmentation pattern (panels **E** and **F**) matching those of the 3HPA standard. No SIM  $m/z 89$  peak was observed in control samples with acrylate extract or 3HPA standard omitted. By comparison of the SIM  $m/z 89$  peak areas the concentration of 3HPA in the polyacrylate extract was estimated to be  $\sim 20$  mM.



Figure S3

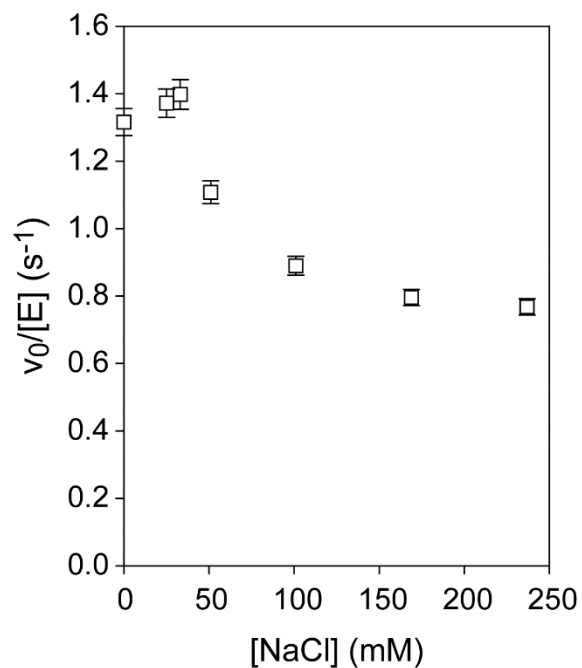

**Figure S3.** Inhibition of *Av3MDO* catalyzed oxidation of **3MPA** with increasing NaCl concentration. Assays were performed at fixed and saturated **3MPA** concentration (1 mM) in a buffered 20 mM HEPES pH 8 solution at fixed temperature ( $25 \pm 1 \text{ }^\circ\text{C}$ ). Salt concentrations were varied from 0 to 240 mM.

Figure S4

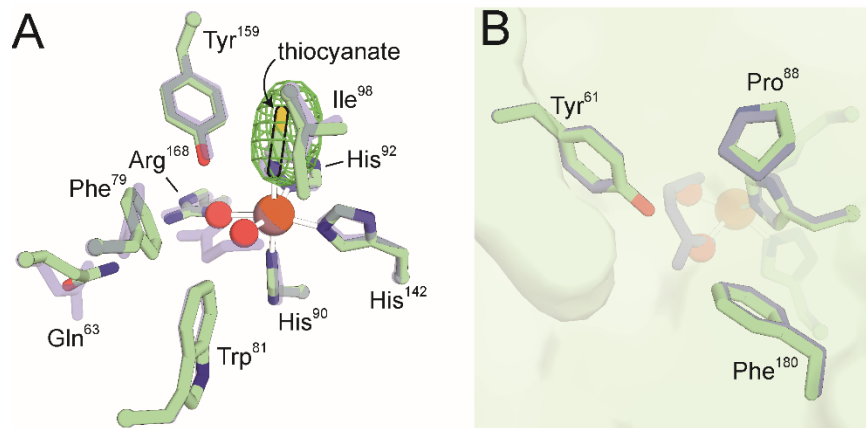

**Figure S4.** Crystal structure of Av3MDO in complex with thiocyanate (green) and its comparison to the 3HPA-bound Av3MDO structure (grey). **A.** Active site comparison between the two structure showing conformational differences in Gln63, Phe79, and Ile98. The green mesh represents unbiased, NCS-averaged, sigma A-weighted Fo-Fc electron density in the axial coordination position supporting the modeling of thiocyanate at this site. **B.** The tunnel providing access to the active site remains occluded in the thiocyanate-bound Av3MDO structure with the gatekeeper residues Tyr61, Pro88, and Phe180 found in nearly identical positions as compared to the 3HPA-bound structure.

Figure S5

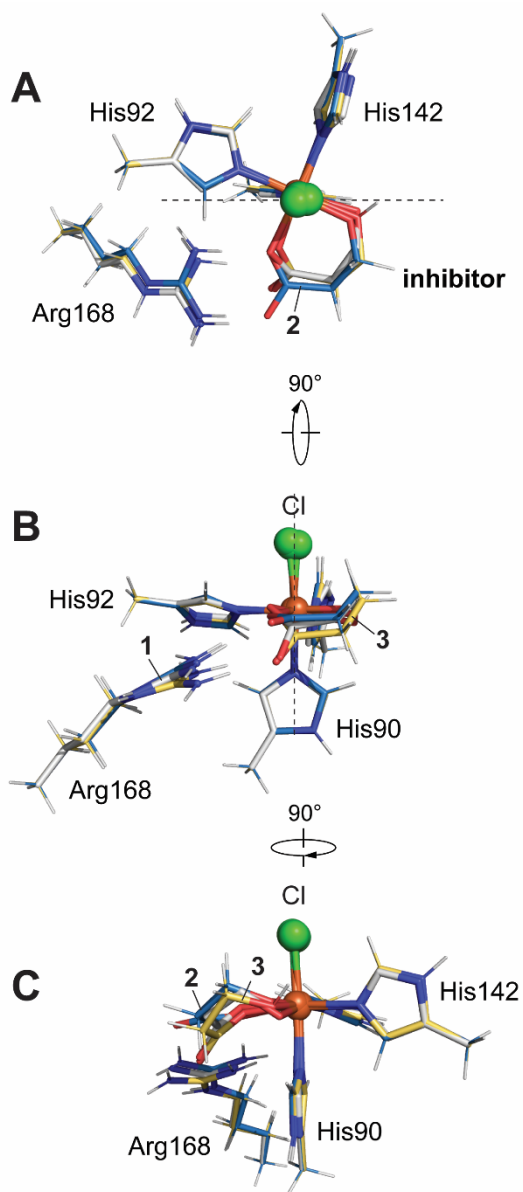

**Figure S5.** Selected viewpoints (A-C) of the *Av3MDO-3HPA* complex ([1], code 6XB9, shown in white) overlaid on DFT optimized structures for the 3HPA-bound Fe-site. Structures for the deprotonated ([2], 3HPA<sup>2-</sup>, blue carbon atoms) and protonated ([3], 3HPA<sup>1-</sup>, yellow carbon atoms) inhibitor alcohol are presented for comparison. The top-down view shown in panel A aligns all structures along the [His90-Fe-Cl] axis. Panel B illustrates a 90° rotation of A along the perpendicular axis (dashed line). Clockwise rotation (-90°) of B around the [His90-Fe-Cl] axis results in Panel C. Selected distances, angles, and RMSD values are presented in Table 2 for comparison.

*Orientation of Y159 hydrogen bond* - Multiple pH-dependent kinetic studies verify that both Tyr159 and His157 of Av3MDO are protonated in the catalytically active state (6-8). The crystal structures for the Av3MDO-3HPA complex presents three possible proton-acceptors for Tyr159. The N $\delta$ -atom of His157 (2.86 Å), the chloride bound to the axial Fe- site (2.85 Å), and the proximal 3HPA-carboxylate O-atom (3.01 Å). Alternatively, the directionality of the proton relay network could be reversed by N $\delta$ -His157 donation of an H-bond to the Tyr159 phenol O-atom. This leaves Tyr159 free to donate a hydrogen bond to either the axial chloride or the 3HPA-carboxylate.

Figure S6.

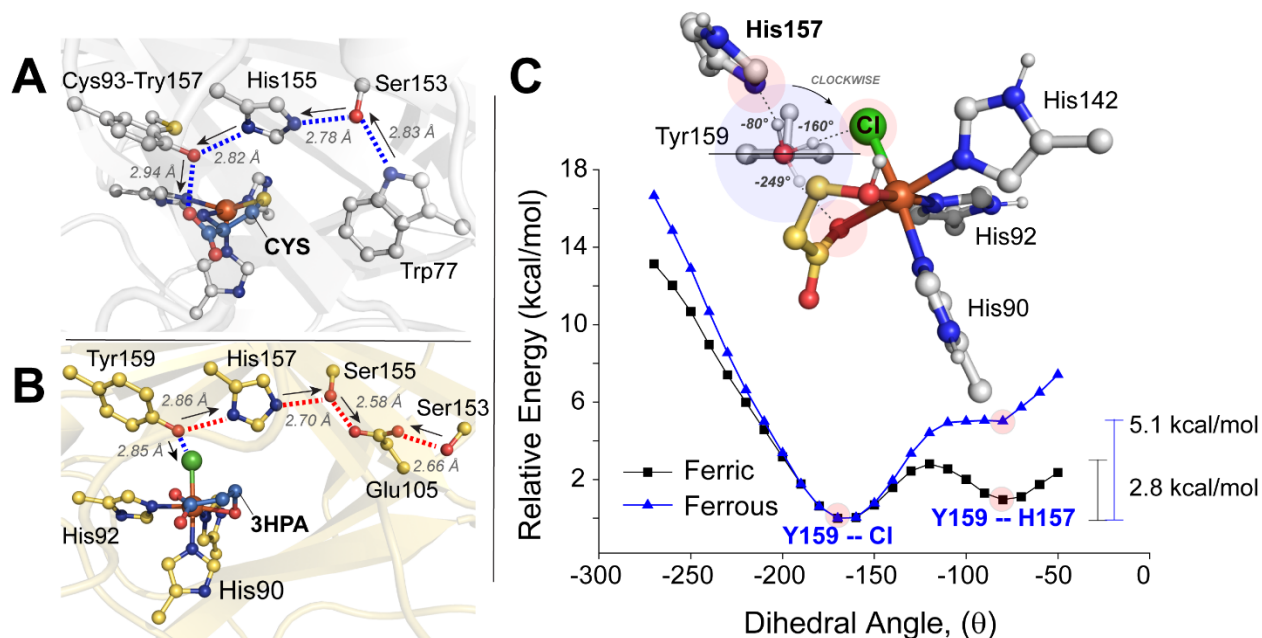

**Figure S6.** Comparison of CYS-bound rat CDO (**A**, PDB 4IEV) and 3HPA-bound Av3MDO (**B**, PDB 6XB9) structures highlighting the extended proton relay network for each enzyme. **C.** Energy surface for Tyr159 H-bond donation/acceptor interactions as a function of dihedral bond angle. Given the ambiguous oxidation state of the Fe-site in the SXB9 structure, relaxed surface scan calculations were performed for both ferrous (*blue*) and ferric (*black*) states.

The energy surface for potential Tyr159 H-bond acceptors was evaluated using a relaxed surface scan (9-11) of the Av3MDO-3HPA complex. Calculations included Fe-coordinated histidine residues (His90, His92, and His142), the 'SHY' motif (Tyr159, His157, and Ser155), Arg168, 3HPA<sup>-1</sup>, and chlorine with coordinates taken from the Av3MDO crystal structure. All hydrogens were optimized while constraining the crystal structure coordinates. The Tyr159 phenol hydrogen was varied in orientation by varying the dihedral angle defined by the Tyr159 atoms C $\epsilon$ -C $\xi$ -O $\eta$ -H. Where C $\epsilon$  denotes the Tyrosine  $\epsilon$ -carbon in closest proximity to H157. The path of the relaxed surface scan placed the phenol hydrogen oriented towards the N $\delta$ -atom of His157, axial iron-bound chlorine, and 3HPA-carboxyl group while keeping the crystal structure rigid. This calculation was done for both Fe(II) and Fe(III) oxidation states to evaluate its influence (if any) on the preferred H-bond orientation. It should be noted that this model does not account for rotation of the tyrosine aromatic ring or other geometric perturbations and thus the values should be considered qualitative.

As illustrated above (**Figure S6C**, *black*), for the ferric state, an activation barrier of 2.8 kcal/mol is calculated for the Tyr159 → His157 configuration from Tyr159 → Cl. Given the small energy barrier and overall energy difference of >1 kcal/mol, it is reasonable that Tyr159 could alternate between donating a hydrogen bond to both His157 and the more preferred iron-bound chlorine. By contrast, the proximal O-atom of the **3HPA**-carboxylate is a poor H-bond acceptor for Tyr159 and is unfavorable in this model. The ferrous state (**Fig. S6C**, *blue*) calculations show a more dramatic bias towards Tyr159 → Cl donation. The energy difference between donation towards Cl or His157 is approximately 5 kcal/mol. Qualitatively the activation barrier is also approximately 5 kcal/mol as the Tyr159 → His157 orientation is not in a local minimum. Based on these observations, it can be argued that Tyr159 donates an H-bond to the iron-bound Cl-atom in the *Av3MDO-3HPA* complex. Potentially, substitution of the axial chloride ligand for NO could alter the orientation of the Tyr159 H-bond to favor donation to H157. However, this would be inconsistent with previous EPR studies which demonstrate attenuated NO-binding for the Y159F variant (and to a lesser extent H157N). Moreover, as both chlorine and nitrosyl ligands have an equivalent formal charge (-1), an argument can be made that H-bond donation from Tyr159 would similarly favor axially bound NO over His157.

Figure S7

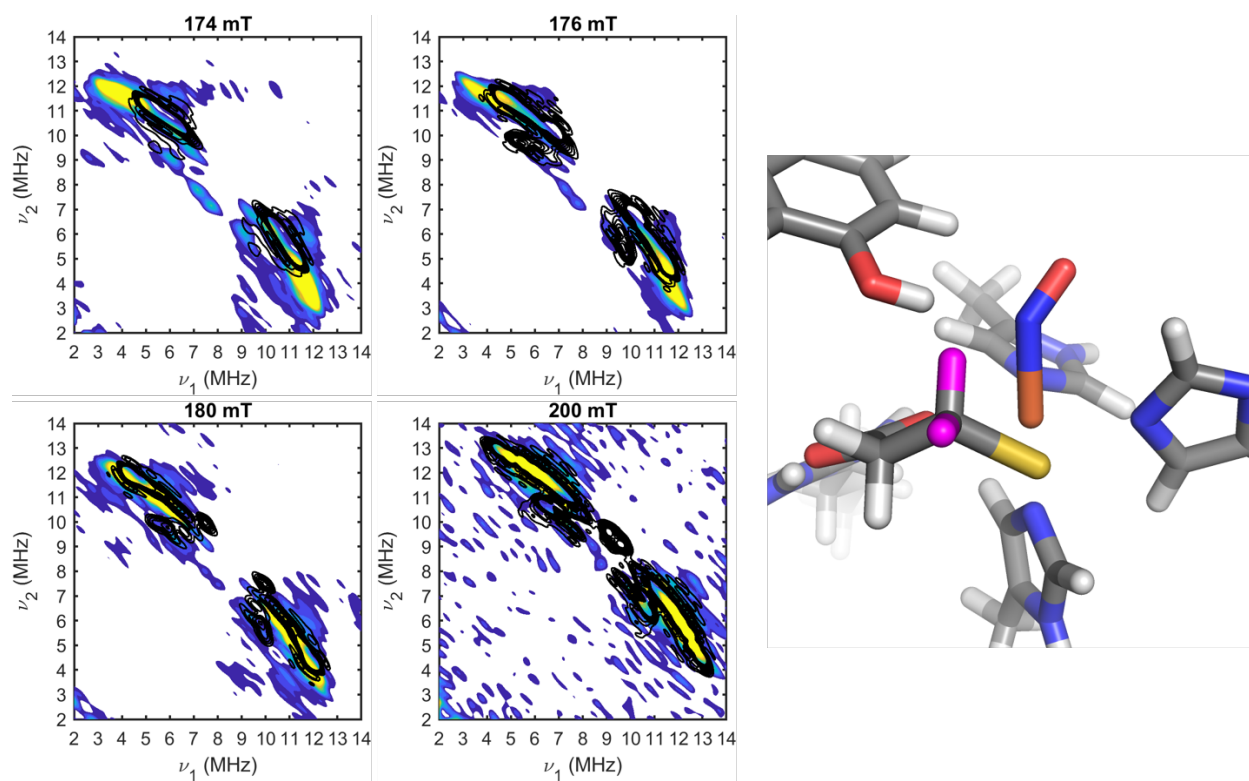

**Figure S7.** HYSORE spectra and simulations of the  $^1\text{H}$  on **3MPA** (shown in magenta) at 174, 176, 180, and 200 mT. Experimental spectra appear as color contours; simulations are overlaid as black contour lines. The anisotropic hyperfine couplings and the positions of each nucleus relative to the magnetic axis system are listed in **Table S5**.

Figure S8

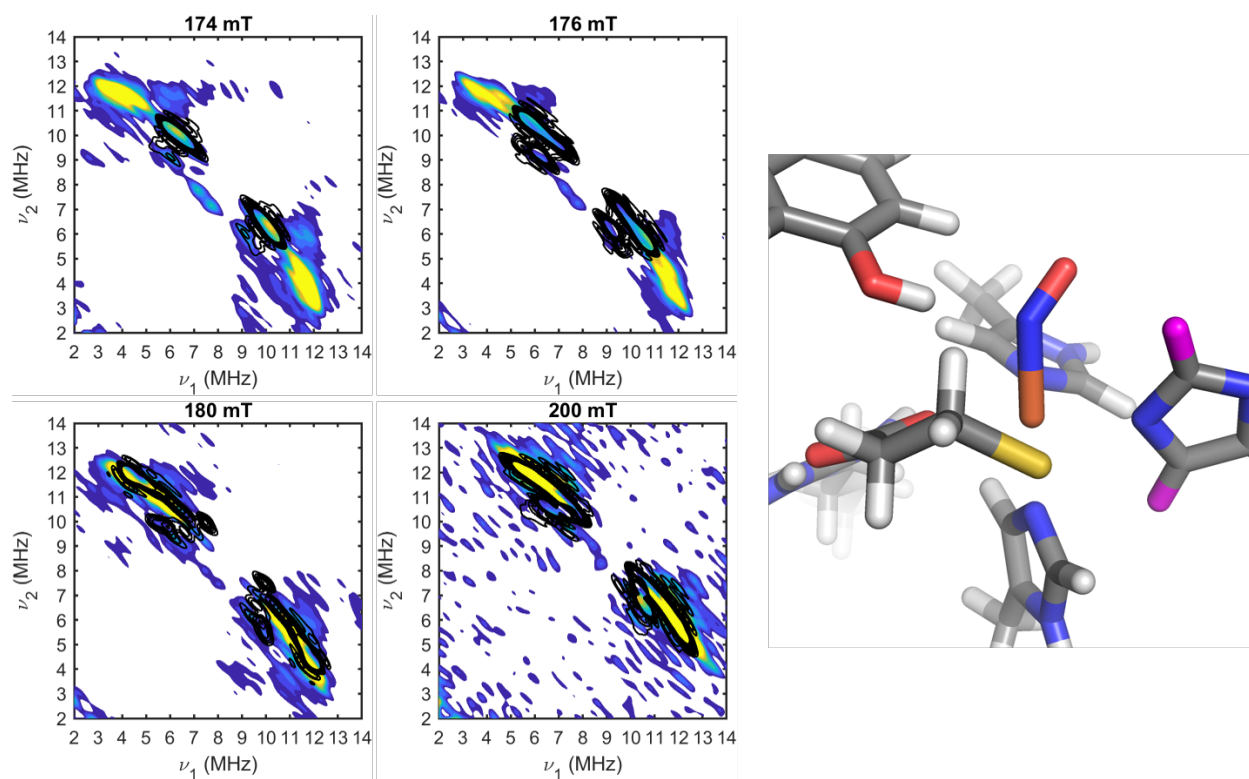

**Figure S8.** HYSCORE spectra and simulations of the  $^1\text{H}$  on His142 (*shown in magenta*) at 174, 176, 180, and 200 mT. Experimental spectra appear as color contours; simulations are overlaid as black contour lines. The anisotropic hyperfine couplings and the positions of each nucleus relative to the magnetic axis system are listed in **Table S5**.

Figure S9

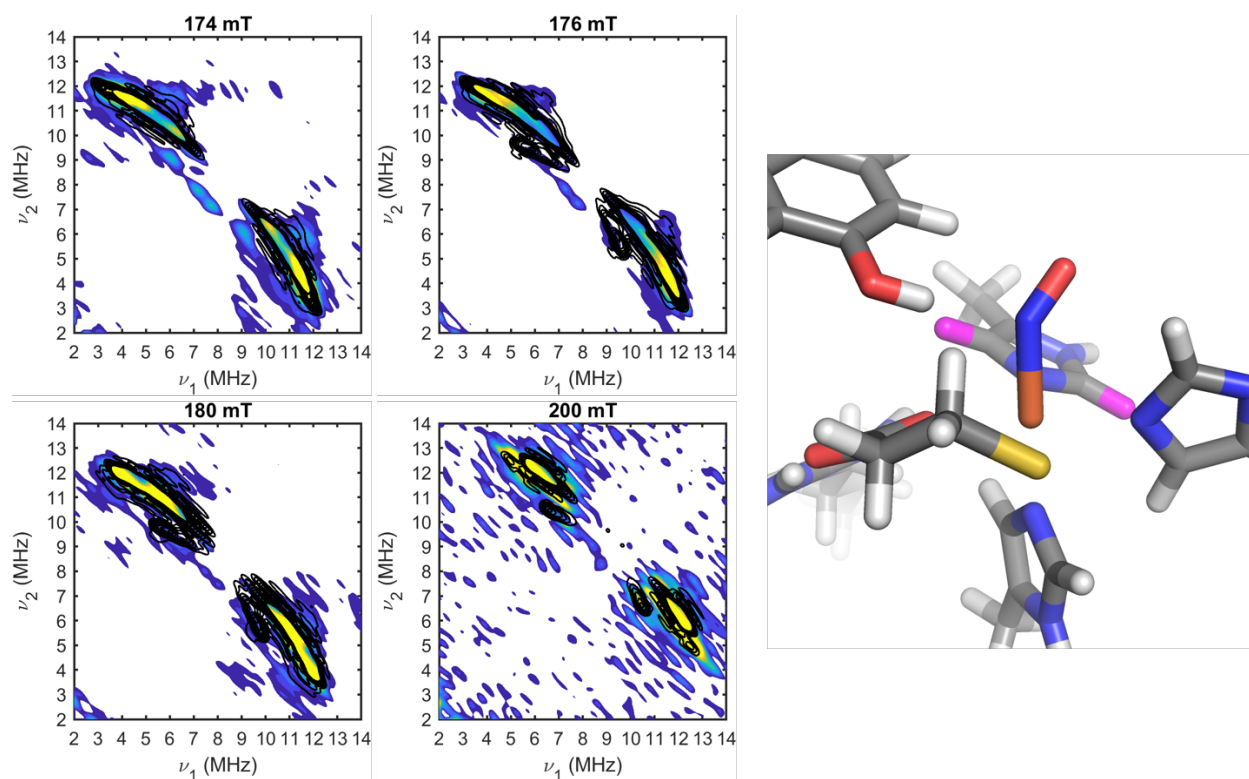

**Figure S9.** HYSORE spectra and simulations of the  $^1\text{H}$  on His92 (shown in magenta) at 174, 176, 180, and 200 mT. Experimental spectra appear as color contours; simulations are overlaid as black contour lines. The anisotropic hyperfine couplings and the positions of each nucleus relative to the magnetic axis system are listed in **Table S5**.



Figure S10

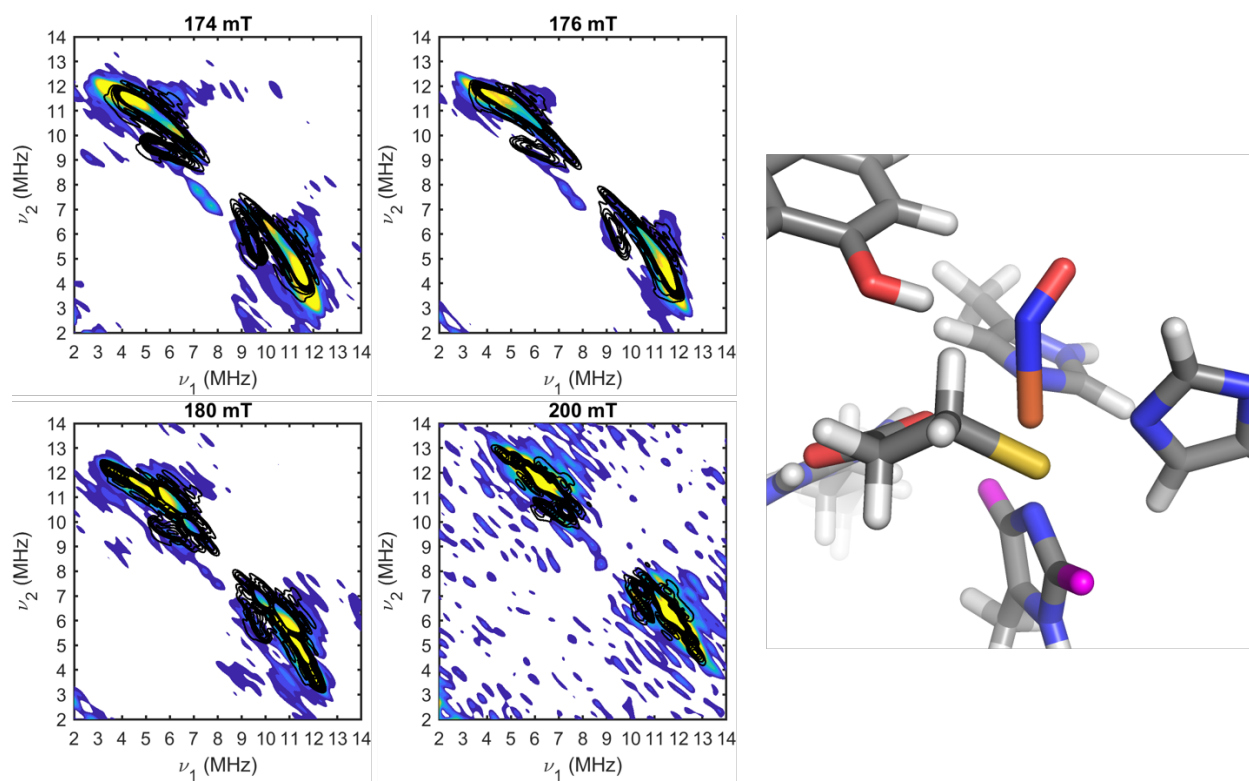

**Figure S10.** HYSCORE spectra and simulations of the  $^1\text{H}$  on His90 (*shown in magenta*) at 174, 176, 180, and 200 mT. Experimental spectra appear as color contours; simulations are overlaid as black contour lines. The anisotropic hyperfine couplings and the positions of each nucleus relative to the magnetic axis system are listed in **Table S5**.

Figure S11

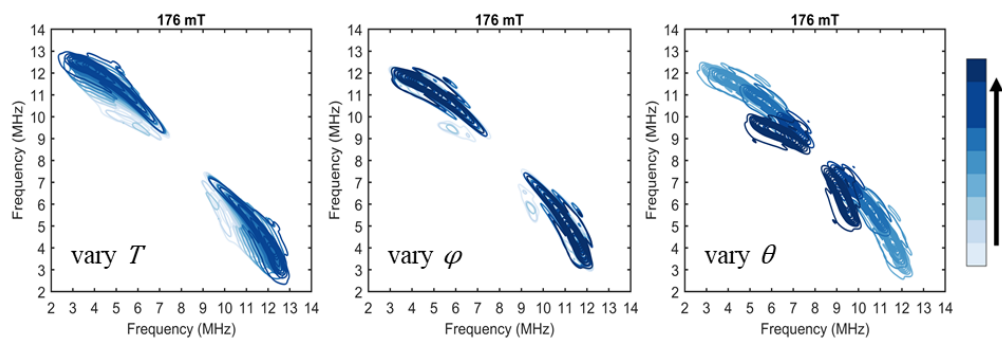

**Figure S11.** HYSORE simulations of the closest  $^1\text{H}$  on **3MPA** at 176 mT. Color gradient represents the simulations that result from increasing the value of  $T$  in increments of 0.25 MHz (left) and the angles  $\varphi$  and  $\theta$  in increments of  $15^\circ$  (center and right, respectively).

Figure S12

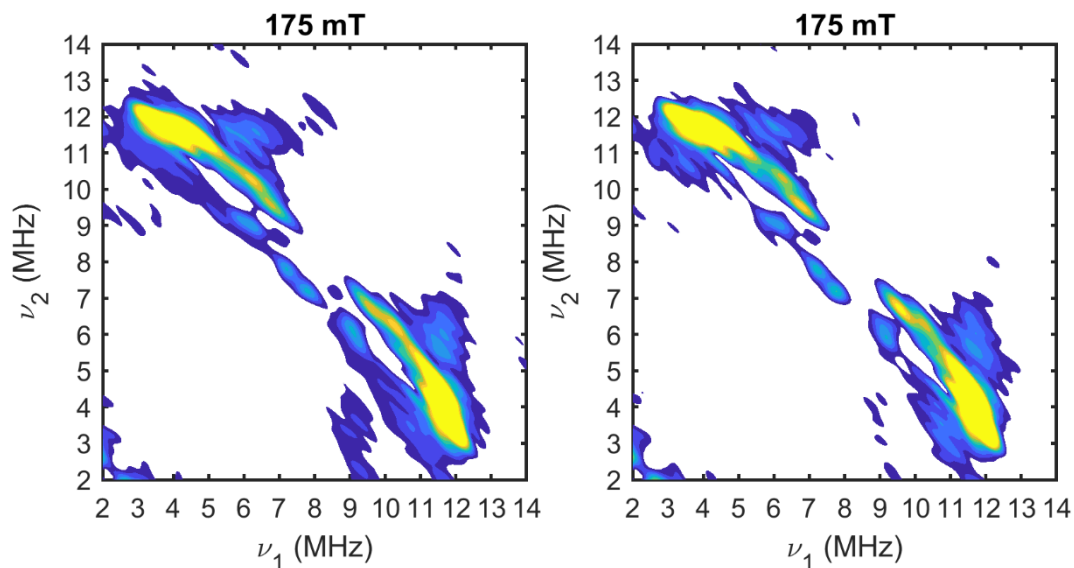

**Figure S12.** HYSCORE spectra (at 175 mT) for (3MPA/NO)-bound Av3MDO iron-nitrosyl prepared in  $^1\text{H}_2\text{O}$  (*left*) buffer as compared to samples exchanged into  $^2\text{H}_2\text{O}$  buffer (*right*). For clarity, the HYSCORE data is focused entirely on the proton region of the spectra for comparison to  $^2\text{H}_2\text{O}$ -data. The absence of  $^1\text{H}$  peaks lost upon exchange into deuterated buffer suggests no solvent-derived ligands are coordinated to the Fe-site. The expanded HYSCORE spectra of the  $^1\text{H}_2\text{O}$  data at 175 mT (*left*) is presented in **Fig. 8B**.

Figure S13

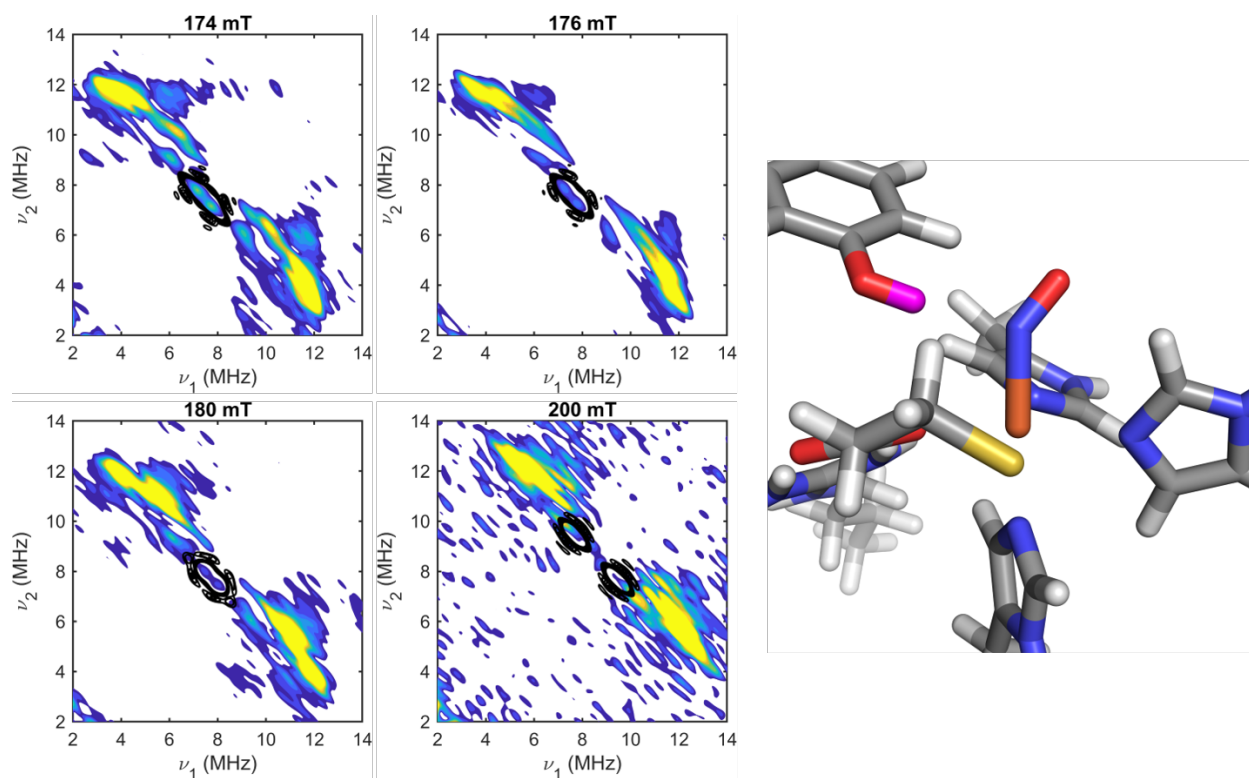

**Figure S13.** HYSORE spectra and simulations of the  $^1\text{H}$  on the hydroxyl group of Tyr159 (*shown in magenta*) at 174, 176, 180, and 200 mT. Experimental spectra appear as color contours; simulations are overlaid as black contour lines. The simulations were calculated with an anisotropic hyperfine coupling of 0.95 MHz and values of  $40^\circ$  and  $20^\circ$  for  $\theta$  and  $\varphi$ , respectively.

## CARTESIAN COORDINATES (Å) FOR SELECTED MODELS

### 3MPA-bound Fe(III) MDO: Figure 6A-B (*white*)

|   |           |           |            |
|---|-----------|-----------|------------|
| H | -0.650665 | 5.196980  | -3.480381  |
| C | 0.043044  | 4.393511  | -3.810041  |
| C | 0.389368  | 3.454927  | -2.704539  |
| C | -0.294929 | 2.374957  | -2.170192  |
| N | 1.560951  | 3.531272  | -1.964934  |
| C | 1.567036  | 2.530631  | -1.042361  |
| N | 0.446082  | 1.816556  | -1.144985  |
| H | 0.947061  | 4.879654  | -4.227719  |
| H | -0.458354 | 3.851628  | -4.635215  |
| H | -1.260255 | 1.966679  | -2.471889  |
| H | 2.309613  | 4.215469  | -2.100812  |
| H | 2.380602  | 2.331782  | -0.337970  |
| H | -5.145542 | -0.170879 | -3.619917  |
| C | -5.125358 | -0.719738 | -2.653956  |
| C | -4.017623 | -0.204012 | -1.801587  |
| C | -2.731610 | -0.659407 | -1.545621  |
| N | -4.108009 | 1.002045  | -1.119387  |
| C | -2.925449 | 1.241877  | -0.489648  |
| N | -2.071309 | 0.254229  | -0.740353  |
| H | -5.008614 | -1.794365 | -2.893642  |
| H | -6.117770 | -0.588111 | -2.177323  |
| H | -2.250104 | -1.588981 | -1.861295  |
| H | -4.935763 | 1.601724  | -1.077851  |
| H | -2.726646 | 2.123190  | 0.127659   |
| H | -1.549177 | 5.264368  | 2.640892   |
| C | -1.720819 | 4.456978  | 3.377330   |
| C | -1.336438 | 3.123773  | 2.824346   |
| C | -0.760310 | 2.731605  | 1.624042   |
| N | -1.544688 | 1.937566  | 3.517589   |
| C | -1.116329 | 0.895507  | 2.756643   |
| N | -0.637168 | 1.349298  | 1.600343   |
| H | -2.796119 | 4.469168  | 3.655434   |
| H | -1.141414 | 4.704893  | 4.290318   |
| H | -0.430794 | 3.351783  | 0.786380   |
| H | -1.950325 | 1.856838  | 4.453096   |
| H | -1.169297 | -0.158097 | 3.047803   |
| H | -4.631338 | 1.817273  | -10.348492 |
| C | -4.447775 | 2.512029  | -9.502023  |
| H | -3.613703 | 3.183515  | -9.797597  |
| C | -4.178612 | 1.816575  | -8.156824  |
| C | -2.860806 | 1.036462  | -8.050456  |

|    |           |           |           |
|----|-----------|-----------|-----------|
| C  | -2.636147 | 0.473823  | -6.638548 |
| N  | -1.398117 | -0.299709 | -6.578682 |
| C  | -0.651136 | -0.547695 | -5.479535 |
| N  | -1.075400 | -0.165815 | -4.253644 |
| N  | 0.533585  | -1.151735 | -5.593797 |
| H  | -5.354836 | 3.138412  | -9.381738 |
| H  | -5.023670 | 1.131860  | -7.920623 |
| H  | -4.189076 | 2.591057  | -7.357155 |
| H  | -2.003788 | 1.694692  | -8.313339 |
| H  | -2.855304 | 0.196659  | -8.781416 |
| H  | -3.507389 | -0.155014 | -6.340109 |
| H  | -2.565902 | 1.308024  | -5.907474 |
| H  | -1.085540 | -0.740192 | -7.446489 |
| H  | -0.494670 | -0.400469 | -3.425668 |
| H  | -2.071670 | -0.035289 | -4.075433 |
| H  | 0.951289  | -1.282651 | -6.515171 |
| H  | 1.087911  | -1.377710 | -4.716377 |
| Fe | 0.000000  | 0.000000  | 0.000000  |
| C  | 1.724416  | -1.369261 | -2.177822 |
| O  | 0.581565  | -0.924913 | -1.773860 |
| C  | 2.891318  | -1.582200 | -1.216953 |
| O  | 1.952429  | -1.644411 | -3.383123 |
| C  | 2.619212  | -1.656163 | 0.282256  |
| S  | 2.075014  | -0.077732 | 1.023478  |
| H  | 3.383131  | -2.521430 | -1.546960 |
| H  | 3.551109  | -1.954210 | 0.802075  |
| H  | 1.844346  | -2.416364 | 0.510057  |
| H  | 3.622706  | -0.773104 | -1.433495 |
| Cl | -0.815983 | -1.998656 | 0.951838  |

**3MPA-bound Fe(II) MDO: Figure 6C-D (white)**

|   |           |          |           |
|---|-----------|----------|-----------|
| H | -0.659818 | 5.172145 | -3.543928 |
| C | 0.033890  | 4.368677 | -3.873587 |
| C | 0.400611  | 3.410832 | -2.787567 |
| C | -0.360249 | 2.517794 | -2.049616 |
| N | 1.706147  | 3.185966 | -2.372522 |
| C | 1.704899  | 2.197730 | -1.433411 |
| N | 0.461088  | 1.777664 | -1.219723 |
| H | 0.937908  | 4.854820 | -4.291266 |
| H | -0.467507 | 3.826793 | -4.698762 |
| H | -1.439078 | 2.349165 | -2.082939 |
| H | 2.536057  | 3.664863 | -2.728537 |
| H | 2.588319  | 1.783644 | -0.934540 |

|   |           |           |            |
|---|-----------|-----------|------------|
| H | -5.154695 | -0.195713 | -3.683464  |
| C | -5.134511 | -0.744572 | -2.717503  |
| C | -4.021256 | -0.251300 | -1.856721  |
| C | -2.697586 | -0.647659 | -1.708352  |
| N | -4.151498 | 0.858212  | -1.033404  |
| C | -2.950565 | 1.093123  | -0.427569  |
| N | -2.052460 | 0.199686  | -0.827221  |
| H | -5.017768 | -1.819199 | -2.957189  |
| H | -6.126923 | -0.612945 | -2.240870  |
| H | -2.176432 | -1.500512 | -2.152987  |
| H | -5.010846 | 1.391415  | -0.884704  |
| H | -2.772779 | 1.904596  | 0.285208   |
| H | -1.558330 | 5.239533  | 2.577346   |
| C | -1.729973 | 4.432144  | 3.313783   |
| C | -1.346636 | 3.090646  | 2.781716   |
| C | -0.739490 | 2.674166  | 1.604885   |
| N | -1.583726 | 1.920150  | 3.489786   |
| C | -1.135967 | 0.861032  | 2.750189   |
| N | -0.622915 | 1.291369  | 1.601905   |
| H | -2.805272 | 4.444333  | 3.591887   |
| H | -1.150567 | 4.680059  | 4.226771   |
| H | -0.385250 | 3.274663  | 0.761954   |
| H | -2.009084 | 1.859371  | 4.416928   |
| H | -1.212206 | -0.190542 | 3.045725   |
| H | -4.640491 | 1.792439  | -10.412039 |
| C | -4.456928 | 2.487194  | -9.565570  |
| H | -3.622856 | 3.158681  | -9.861144  |
| C | -4.168938 | 1.797033  | -8.220691  |
| C | -2.781148 | 1.156292  | -8.096671  |
| C | -2.500119 | 0.599871  | -6.692634  |
| N | -1.152895 | 0.045491  | -6.638860  |
| C | -0.398915 | -0.186103 | -5.533327  |
| N | -0.852690 | 0.072815  | -4.296496  |
| N | 0.838305  | -0.683208 | -5.674836  |
| H | -5.363989 | 3.113578  | -9.445285  |
| H | -4.950211 | 1.032129  | -8.014562  |
| H | -4.271630 | 2.555542  | -7.412401  |
| H | -1.998026 | 1.908634  | -8.337513  |
| H | -2.670484 | 0.335519  | -8.840867  |
| H | -3.263773 | -0.167810 | -6.425424  |
| H | -2.583756 | 1.419703  | -5.945313  |
| H | -0.751642 | -0.268072 | -7.524425  |
| H | -0.265227 | -0.231392 | -3.463350  |

|    |           |           |           |
|----|-----------|-----------|-----------|
| H  | -1.837958 | 0.276042  | -4.133880 |
| H  | 1.246318  | -0.701712 | -6.610394 |
| H  | 1.497545  | -0.622518 | -4.818350 |
| Fe | 0.000000  | 0.000000  | 0.000000  |
| C  | 1.930677  | -0.981455 | -2.503181 |
| O  | 0.689135  | -0.970618 | -2.213910 |
| C  | 2.946857  | -1.653098 | -1.579882 |
| O  | 2.413439  | -0.501704 | -3.582700 |
| C  | 2.533572  | -1.899798 | -0.134337 |
| S  | 2.171590  | -0.346624 | 0.773161  |
| H  | 3.194433  | -2.621831 | -2.076482 |
| H  | 3.348165  | -2.445754 | 0.386958  |
| H  | 1.623401  | -2.532142 | -0.088783 |
| H  | 3.876377  | -1.049110 | -1.623223 |
| Cl | -0.932213 | -2.076951 | 0.959885  |

**3HPA<sup>-1</sup>-bound Fe(III) MDO: Figure S4 [3]**

|   |           |           |           |
|---|-----------|-----------|-----------|
| H | -0.512996 | 5.123085  | -3.483805 |
| C | 0.181136  | 4.323343  | -3.819805 |
| C | 0.512946  | 3.391293  | -2.701982 |
| C | -0.174119 | 2.312246  | -2.165755 |
| N | 1.655287  | 3.503223  | -1.922860 |
| C | 1.647362  | 2.532805  | -0.971914 |
| N | 0.539365  | 1.797654  | -1.095684 |
| H | 1.085671  | 4.811009  | -4.233053 |
| H | -0.320321 | 3.781379  | -4.644189 |
| H | -1.130164 | 1.886705  | -2.476802 |
| H | 2.395672  | 4.199273  | -2.049713 |
| H | 2.433323  | 2.385609  | -0.226363 |
| H | -4.997627 | -0.243256 | -3.624668 |
| C | -4.981542 | -0.795032 | -2.660837 |
| C | -3.882057 | -0.297029 | -1.786774 |
| C | -2.562151 | -0.689687 | -1.615613 |
| N | -4.040698 | 0.796256  | -0.945156 |
| C | -2.876595 | 1.040051  | -0.298290 |
| N | -1.958755 | 0.152612  | -0.692119 |
| H | -4.864180 | -1.869148 | -2.900769 |
| H | -5.972215 | -0.659890 | -2.182810 |
| H | -2.017194 | -1.523128 | -2.067573 |
| H | -4.907517 | 1.326272  | -0.818218 |
| H | -2.725220 | 1.845678  | 0.426076  |
| H | -1.410421 | 5.194799  | 2.633177  |
| C | -1.580171 | 4.386388  | 3.368195  |



|    |           |           |            |
|----|-----------|-----------|------------|
| C  | -1.166585 | 3.057143  | 2.836376   |
| C  | -0.605267 | 2.655782  | 1.635427   |
| N  | -1.296715 | 1.886961  | 3.575512   |
| C  | -0.843633 | 0.841613  | 2.845793   |
| N  | -0.413200 | 1.276802  | 1.654695   |
| H  | -2.655304 | 4.390544  | 3.645032   |
| H  | -1.001421 | 4.629013  | 4.282392   |
| H  | -0.336554 | 3.263503  | 0.769013   |
| H  | -1.674703 | 1.820361  | 4.524847   |
| H  | -0.847708 | -0.200792 | 3.176875   |
| H  | -4.493511 | 1.740848  | -10.355650 |
| C  | -4.309805 | 2.436095  | -9.509782  |
| H  | -3.476660 | 3.108239  | -9.806178  |
| C  | -4.008639 | 1.696561  | -8.202399  |
| C  | -2.718933 | 0.868204  | -8.233751  |
| C  | -2.456576 | 0.169469  | -6.896131  |
| N  | -1.196847 | -0.571516 | -6.916130  |
| C  | -0.309104 | -0.630861 | -5.907795  |
| N  | -0.603713 | -0.150976 | -4.684759  |
| N  | 0.908846  | -1.163694 | -6.113153  |
| H  | -5.217429 | 3.061288  | -9.388605  |
| H  | -4.863044 | 1.031218  | -7.945322  |
| H  | -3.938419 | 2.434686  | -7.372041  |
| H  | -1.852333 | 1.522851  | -8.472788  |
| H  | -2.778230 | 0.106298  | -9.043022  |
| H  | -3.300505 | -0.512048 | -6.646026  |
| H  | -2.394200 | 0.929439  | -6.089695  |
| H  | -0.951815 | -1.056695 | -7.782849  |
| H  | 0.155138  | -0.219779 | -3.973730  |
| H  | -1.573684 | -0.063029 | -4.384145  |
| H  | 1.265012  | -1.312792 | -7.057130  |
| H  | 1.556798  | -1.223173 | -5.319517  |
| Fe | 0.000000  | 0.000000  | 0.000000   |
| C  | 1.824473  | -0.732165 | -2.200324  |
| O  | 0.705661  | -0.949192 | -1.573223  |
| C  | 3.108370  | -0.738706 | -1.382936  |
| O  | 1.870952  | -0.524933 | -3.427259  |
| C  | 2.940822  | -1.010481 | 0.099010   |
| O  | 2.125411  | 0.056650  | 0.680625   |
| H  | 3.773436  | -1.513202 | -1.818321  |
| H  | 3.925780  | -1.008222 | 0.605332   |
| H  | 2.442167  | -1.984384 | 0.279905   |
| H  | 3.620202  | 0.230907  | -1.554935  |
| Cl | -0.334927 | -1.907827 | 1.206628   |
| H  | 2.098497  | -0.077710 | 1.649766   |

(3MPA/NO)-bound Av3MDO: Figure 7

|   |           |           |           |
|---|-----------|-----------|-----------|
| H | -0.657168 | 5.182547  | -3.470783 |
| C | 0.037195  | 4.377758  | -3.796259 |
| C | 0.367124  | 3.468050  | -2.666676 |
| C | -0.205132 | 2.288917  | -2.251554 |
| N | 1.363176  | 3.723848  | -1.739865 |
| C | 1.377406  | 2.718439  | -0.831737 |
| N | 0.433065  | 1.839845  | -1.114371 |
| H | 0.942132  | 4.862872  | -4.213494 |
| H | -0.462560 | 3.834405  | -4.621596 |
| H | -1.015569 | 1.736086  | -2.709643 |
| H | 1.992852  | 4.520562  | -1.743532 |
| H | 2.078191  | 2.650176  | -0.004467 |
| H | -5.153299 | -0.186197 | -3.610683 |
| C | -5.134348 | -0.733048 | -2.643426 |
| C | -4.032284 | -0.221588 | -1.787813 |
| C | -2.747398 | -0.660680 | -1.548337 |
| N | -4.137655 | 0.964107  | -1.087555 |
| C | -2.960471 | 1.208300  | -0.466477 |
| N | -2.096413 | 0.248524  | -0.735998 |
| H | -5.016000 | -1.807506 | -2.882765 |
| H | -6.128073 | -0.602434 | -2.169123 |
| H | -2.258101 | -1.566562 | -1.893568 |
| H | -4.965913 | 1.548737  | -1.031276 |
| H | -2.781305 | 2.074240  | 0.161597  |
| H | -1.568815 | 5.259027  | 2.650252  |
| C | -1.741950 | 4.452357  | 3.387237  |
| C | -1.321639 | 3.125479  | 2.851428  |
| C | -0.901586 | 2.713012  | 1.606545  |
| N | -1.294415 | 1.979792  | 3.625780  |
| C | -0.882994 | 0.943324  | 2.861753  |
| N | -0.639433 | 1.352270  | 1.630606  |
| H | -2.817877 | 4.465849  | 3.663360  |
| H | -1.164213 | 4.702319  | 4.300884  |
| H | -0.770141 | 3.307447  | 0.709429  |
| H | -1.542540 | 1.919426  | 4.608444  |
| H | -0.772007 | -0.070348 | 3.234403  |
| H | -3.955304 | -8.732796 | -1.303464 |
| C | -4.645789 | -8.042482 | -1.832776 |
| H | -5.438392 | -8.657832 | -2.307857 |

|    |           |           |            |
|----|-----------|-----------|------------|
| C  | -3.928354 | -7.187393 | -2.886579  |
| C  | -2.824045 | -6.306712 | -2.342035  |
| C  | -3.099846 | -5.199012 | -1.522854  |
| C  | -1.476862 | -6.575671 | -2.632917  |
| C  | -2.077016 | -4.396779 | -1.008233  |
| C  | -0.442891 | -5.781498 | -2.134361  |
| C  | -0.736444 | -4.683865 | -1.312840  |
| O  | 0.299717  | -3.946628 | -0.835528  |
| H  | -5.130242 | -7.407497 | -1.061355  |
| H  | -4.679693 | -6.556765 | -3.395345  |
| H  | -3.504434 | -7.846557 | -3.662129  |
| H  | -4.136123 | -4.950626 | -1.271770  |
| H  | -1.229080 | -7.428499 | -3.271241  |
| H  | -2.320294 | -3.548325 | -0.364797  |
| H  | 0.599797  | -5.998786 | -2.377965  |
| H  | -0.027109 | -3.149316 | -0.383425  |
| H  | -4.623996 | 1.792135  | -10.340640 |
| C  | -4.441755 | 2.488241  | -9.494928  |
| H  | -3.606491 | 3.158312  | -9.790493  |
| C  | -4.187142 | 1.787307  | -8.155582  |
| C  | -2.850467 | 1.054512  | -8.047236  |
| C  | -2.632741 | 0.439244  | -6.662923  |
| N  | -1.349466 | -0.251570 | -6.622493  |
| C  | -0.639863 | -0.584185 | -5.532909  |
| N  | -1.121874 | -0.360550 | -4.299454  |
| N  | 0.565238  | -1.125586 | -5.662115  |
| H  | -5.348558 | 3.115593  | -9.377538  |
| H  | -5.007542 | 1.076813  | -7.946949  |
| H  | -4.238964 | 2.545320  | -7.352799  |
| H  | -2.021900 | 1.752472  | -8.260476  |
| H  | -2.792103 | 0.253656  | -8.807243  |
| H  | -3.457047 | -0.258283 | -6.423829  |
| H  | -2.642459 | 1.235060  | -5.898156  |
| H  | -0.964522 | -0.547953 | -7.513132  |
| H  | -0.569424 | -0.626992 | -3.474119  |
| H  | -2.101282 | -0.153673 | -4.156210  |
| H  | 0.990201  | -1.219386 | -6.576318  |
| H  | 1.069980  | -1.434441 | -4.802797  |
| Fe | 0.000000  | 0.000000  | 0.000000   |
| C  | 1.576968  | -1.558369 | -2.169151  |
| O  | 0.496813  | -0.999314 | -1.751462  |
| C  | 2.758115  | -1.829645 | -1.240526  |
| O  | 1.734304  | -1.886774 | -3.362887  |

|   |           |           |           |
|---|-----------|-----------|-----------|
| C | 2.579796  | -1.768826 | 0.271909  |
| S | 2.187014  | -0.108480 | 0.928069  |
| H | 3.132915  | -2.825747 | -1.526138 |
| H | 3.520971  | -2.093323 | 0.740307  |
| H | 1.809685  | -2.480413 | 0.602968  |
| H | 3.540881  | -1.113480 | -1.544318 |
| N | -0.677029 | -1.559548 | 0.836412  |
| O | -1.488359 | -1.853049 | 1.646726  |

## REFERENCES.

1. Driggers, C. M., Stipanuk, M. H., and Karplus, P. A. (2015) Mammalian cysteine dioxygenase. in *Encyclopedia of Inorganic and Bioinorganic Chemistry* (Scott, R. A. ed., John Wiley & Sons, Ltd.
2. Fischer, A. A., Miller, J. R., Jodts, R. J., Ekanayake, D. M., Lindeman, S. V., Brunold, T. C., and Fiedler, A. T. (2019) Spectroscopic and Computational Comparisons of Thiolate-Ligated Ferric Nonheme Complexes to Cysteine Dioxygenase: Second-Sphere Effects on Substrate (Analogue) Positioning. *Inorg Chem.* **58**, 16487-16499
3. Fischer, A. A., Stracey, N., Lindeman, S. V., Brunold, T. C., and Fiedler, A. T. (2016) Synthesis, X-ray Structures, Electronic Properties, and O<sub>2</sub>/NO Reactivities of Thiol Dioxygenase Active-Site Models. *Inorg Chem.* **55**, 11839-11853
4. Gordon, J. B., McGale, J. P., Prendergast, J. R., Shirani-Sarmazeh, Z., Siegler, M. A., Jameson, G. N. L., and Goldberg, D. P. (2018) Structures, Spectroscopic Properties, and Dioxygen Reactivity of 5- and 6-Coordinate Nonheme Iron(II) Complexes: A Combined Enzyme/Model Study of Thiol Dioxygenases. *J Am Chem Soc.* **140**, 14807-14822
5. Li, W., Blaesi, E. J., Pecore, M. D., Crowell, J. K., and Pierce, B. S. (2013) Second-Sphere Interactions between the C93–Y157 Cross-Link and the Substrate-Bound Fe Site Influence the O<sub>2</sub> Coupling Efficiency in Mouse Cysteine Dioxygenase. *Biochemistry* **52**, 9104-9119
6. Sardar, S., Weitz, A., Hendrich, M. P., and Pierce, B. S. (2019) Outer-Sphere Tyrosine 159 within the 3-Mercaptopropionic Acid Dioxygenase S-H-Y Motif Gates Substrate-Coordination Denticity at the Non-Heme Iron Active Site. *Biochemistry* **58**, 5135-5150
7. Crowell, J. K., Sardar, S., Hossain, M. S., Foss Jr, F. W., and Pierce, B. S. (2016) Non-chemical proton-dependent steps prior to O<sub>2</sub>-activation limit *Azotobacter vinelandii* 3-mercaptopropionic acid dioxygenase (MDO) catalysis. *Arch Biochem Biophys.* **604**, 86-94
8. Pierce, B. S., Subedi, B. P., Sardar, S., and Crowell, J. K. (2015) The “Gln-Type” Thiol Dioxygenase from *Azotobacter vinelandii* Is a 3-Mercaptopropionic Acid Dioxygenase. *Biochemistry* **54**, 7477-7490
9. Dajnowicz, S., Parks, J. M., Hu, X., Gesler, K., Kovalevsky, A. Y., and Mueser, T. C. (2017) Direct evidence that an extended hydrogen-bonding network influences activation of pyridoxal 5'-phosphate in aspartate aminotransferase. *J Biol Chem.* **292**, 5970-5980
10. Bykov, D., Plog, M., and Neese, F. (2014) Heme-bound nitroxyl, hydroxylamine, and ammonia ligands as intermediates in the reaction cycle of cytochrome c nitrite reductase: a theoretical study. *J Biol Inorg Chem* **19**, 97-112
11. Kampa, M., Lubitz, W., van Gastel, M., and Neese, F. (2012) Computational study of the electronic structure and magnetic properties of the Ni–C state in [NiFe] hydrogenases including the second coordination sphere. *J Biol Inorg Chem* **17**, 1269-1281
